# Supplementary material for: Bioengineered bacterial vesicles as biological nano-heaters for optoacoustic imaging
Source: Springer Nature journal article supplement (doi:10.1038/s41467-019-09034-y), 2019-03-07
Supplement: MOESM1 [file 41467_2019_9034_MOESM1_ESM.pdf › 41467_2019_9034_MOESM1_ESM.pdf]

## Supplementary Information

### Bioengineered bacterial vesicles as biological nano-heaters for optoacoustic imaging

*Gujrati et al.*

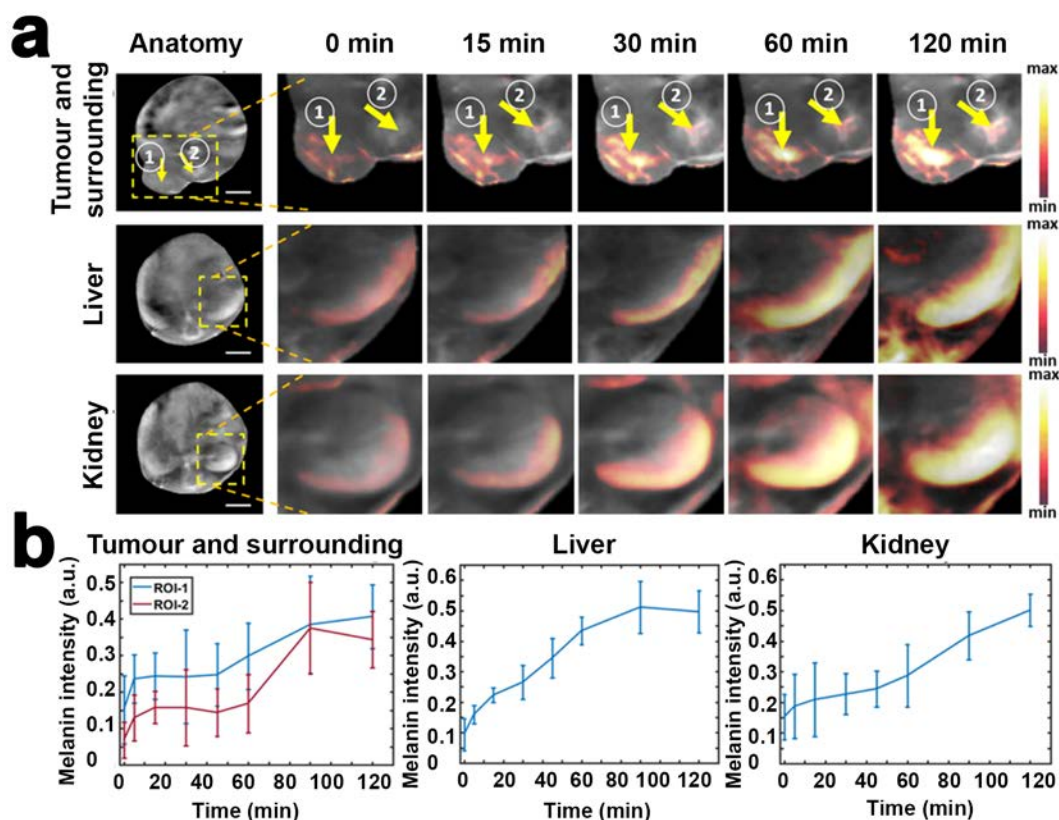

**Supplementary Figure 1. In vivo MSOT imaging.** (a) Melanin signal was monitored in the tumour, surround region, and in vital organs (liver and kidney) during 2 h after tail vein injection of OMV<sup>Mel</sup> in a mouse. The arrow indicates an ROI in the tumor (ROI-1) and surrounding region (ROI-2). Scale bar, 5 mm. (b) Melanin intensity was evaluated in the tumour (ROI-1), surrounding region (ROI-2), liver and kidney, in time dependent manner (0 to 120 min). Melanin intensities are averages calculated from 6 adjacent slices from the tumour centre.

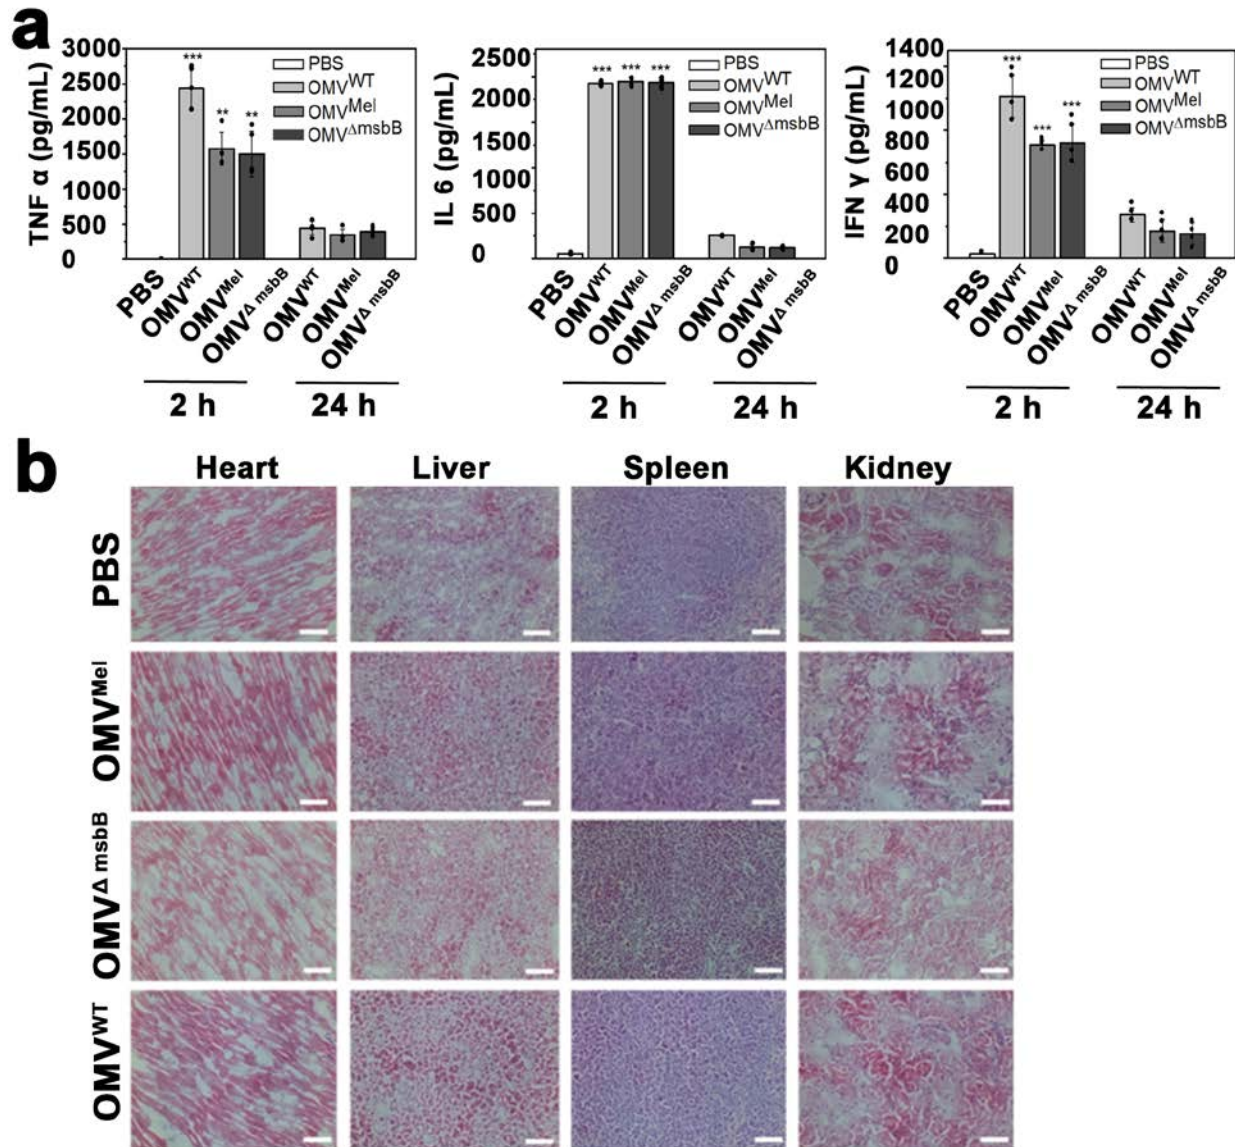

**Supplementary Figure 2. In vivo immunogenicity and safety.** (a) Serum levels of TNF- $\alpha$ , IL-6 and IFN- $\gamma$  were quantified at 2 and 24 h after i.v injection of PBS, OMV<sup>WT</sup>, OMV<sup>Mel</sup> or OMV <sup>$\Delta$ msbB</sup>. Mean values and error bars are presented as mean  $\pm$  SD, inter-group differences were assessed for significance using the paired t test compared to control (\*\*\*)  $p < 0.001$  vs. PBS;  $n=5$  mice/group). (b) Histology of heart, liver, spleen and kidney extracted at 24 h after injection of PBS, OMV<sup>WT</sup>, OMV <sup>$\Delta$ msbB</sup>, or OMV<sup>Mel</sup>. Scale bar, 50  $\mu$ m.
